# Supplementary material for: Development of a Ni-promoted, selective electrochemical reductive cleavage of the C–O bond in lignin model compound benzyl phenyl ether
Source: Royal Society of Chemistry journal article supplement (doi:10.1039/d2gc01510b), 2022-01-01

## Supporting Information (SI)

# Development of a Ni-Promoted, Selective Electrochemical Reductive Cleavage of the C-O bond in Lignin Model Compound Benzyl Phenyl Ether

Fang Lin,<sup>1,2</sup> Ho-Yin TSE,<sup>2,3</sup> Hanno C Erythropel,<sup>2,4,5</sup> Predrag V Petrović,<sup>2,5</sup> Mahlet Garedew<sup>2</sup>, Jinshan Chen<sup>2</sup>, Jason Chun-Ho Lam,<sup>\*6</sup> and Paul T Anastas<sup>\*1,2,4,5,7</sup>

<sup>1</sup> Department of Chemistry, Yale University, 225 Prospect St, New Haven, CT, USA

<sup>2</sup> Center for Green Chemistry & Green Engineering at Yale, 370 Prospect St, New Haven, CT, USA

<sup>3</sup> Department of Civil & Environmental Engineering, The Hong Kong Polytechnic University, Hong Kong

<sup>4</sup> Department of Chemicals and Environmental Engineering, Yale University, 17 Hillhouse Ave, New Haven, CT, USA

<sup>5</sup> Yale School of the Environment, 195 Prospect St, New Haven, CT, USA

<sup>6</sup> City University of Hong Kong, School of Energy and Environment, Kowloon Tong, Hong Kong

<sup>7</sup> Yale School of Public Health, 60 College St, New Haven, CT, USA

\*Corresponding author

**Supplementary Table 1.**

Cathode materials screening for reaction in the divided cell

**Supplementary Table 2.**

Product yields and calculated Faraday efficiency for different substrate concentrations and NiCl<sub>2</sub>·6H<sub>2</sub>O concentrations at 12 hours

**Supplementary Table 3.**

Product yields and calculated Faraday efficiency for reactions with constant ratio of NiCl<sub>2</sub>·6H<sub>2</sub>O/BPE and varying absolute concentrations AT 12 hours

**Supplementary Figure S1.**

Kinetic plot of electrochemical reductive cleavage of 0.2 mmol BPE in 10 mL methanol, 0.1M TBAPF<sub>6</sub>, 20 mA constant current, Ni foam<sub>anode</sub> and Ni foam<sub>cathode</sub> in the undivided cell

**Supplementary Figure S2.**

CV curves of different Ni salts (40 mM) in 15 mL 0.10 M TBAPF<sub>6</sub>-MeOH, scan rate: 50 mV/s.

**Supplementary Figure S3.**

CV curves of CuCl<sub>2</sub>, CoCl<sub>2</sub>·6H<sub>2</sub>O, and FeCl<sub>2</sub>·4H<sub>2</sub>O in 15mL 0.10 M TBAPF<sub>6</sub>-MeOH, 40 mM of metal chloride salts, 10 mM BPE, scan rate: 50 mV/s.

**Supplementary Figure S4.**

Reusability experiments of carbon paper cathode

**Supplementary Figure S5.**

1-(benzyloxy)-4-(tert-butyl)benzene (**d**) <sup>1</sup>H NMR

**Supplementary Figure S6.**

1-(benzyloxy)-4-(tert-butyl)benzene (**d**) <sup>13</sup>C NMR

**Supplementary Figure S7.**

1-(benzyloxy)-4-methylbenzene (**e**) <sup>1</sup>H NMR

**Supplementary Figure S8.**

1-(benzyloxy)-4-methylbenzene (e)  $^{13}\text{C}$  NMR

**Supplementary Figure S9.**

1-(Benzyloxy)-4-methoxybenzene (f)  $^1\text{H}$  NMR

**Supplementary Figure S10.**

1-(Benzyloxy)-4-methoxybenzene (f)  $^{13}\text{C}$  NMR

**Supplementary Figure S11.**

1-(phoxymethyl)-4-(trifluoromethyl) benzene (g)

**Supplementary Figure S12.**

1-(phoxymethyl)-4-(trifluoromethyl) benzene (g)  $^{13}\text{C}$  NMR

**Supplementary Figure S13.**

1-(tert-butyl)-4-(phoxymethyl)benzene (h)  $^1\text{H}$  NMR

**Supplementary Figure S14.**

1-(tert-butyl)-4-(phoxymethyl)benzene (h)  $^{13}\text{C}$  NMR

**Supplementary Figure S15.**

4-Methylbenzylphenyl ether (i)  $^1\text{H}$  NMR

**Supplementary Figure S16.**

4-Methylbenzylphenyl ether (i)  $^{13}\text{C}$  NMR

**Supplementary Figure S17.**

1-methoxy-4-(phoxymethyl) benzene (j)  $^1\text{H}$  NMR

**Supplementary Figure S18.**

1-methoxy-4-(phoxymethyl)benzene (j)  $^{13}\text{C}$  NMR

**Supplementary Figure S19.**

4-(phoxymethyl) phenol (k)  $^1\text{H}$  NMR

**Supplementary Figure S20.**

4-(phoxymethyl) phenol (k)  $^{13}\text{C}$  NMR

**Supplementary Table S1**

Cathode materials screening for reaction in the divided cell

| <b>Entry</b> | <b>Cathode</b>      | <b>Toluene Yield (%)</b> | <b>Phenol Yield (%)</b> |
|--------------|---------------------|--------------------------|-------------------------|
| 1            | Ni foam             | 66                       | 68                      |
| 2            | Pt                  | 50                       | 60                      |
| 3            | Active carbon cloth | 72                       | 70                      |
| 4            | Graphite            | 61                       | 60                      |
| 5            | Glassy carbon       | 63                       | 64                      |
| 6            | Stainless steel     | 64                       | 58                      |
| 7            | Carbon paper        | 80                       | 76                      |

Reaction conditions: divided cell, 15 mL MeOH, 0.1 M TBAPF<sub>6</sub>, constant current at 10 mA, 2 cm<sup>2</sup> cathode, Pt anode, 12 hours; three replicates of the measurements were produced, and the reported value is the average within = 5% of error

### **Supplementary Table S2**

Product yields and calculated Faraday efficiency for different substrate concentrations and NiCl<sub>2</sub>·6H<sub>2</sub>O concentrations at 12 hours

| Entry | BPE (mM) | NiCl <sub>2</sub> ·6H <sub>2</sub> O (mM) | Mole Ratio of NiCl <sub>2</sub> ·6H <sub>2</sub> O/BPE | Conversion (%) | Product Yield (%)                                                                   |                                                                                     | Faraday Efficiency (%) |
|-------|----------|-------------------------------------------|--------------------------------------------------------|----------------|-------------------------------------------------------------------------------------|-------------------------------------------------------------------------------------|------------------------|
|       |          |                                           |                                                        |                |  |  |                        |
| 1     | 5        | 40                                        | 8                                                      | 98             | 85                                                                                  | 80                                                                                  | 2.8                    |
| 2     | 10       | 40                                        | 4                                                      | 98             | 90                                                                                  | 84                                                                                  | 5.9                    |
| 3     | 20       | 40                                        | 2                                                      | 92             | 80                                                                                  | 78                                                                                  | 9.2                    |
| 4     | 30       | 40                                        | 1.33                                                   | 97             | 81                                                                                  | 83                                                                                  | 14.1                   |
| 5     | 50       | 40                                        | 0.8                                                    | 69             | 55                                                                                  | 54                                                                                  | 14.3                   |

Reaction conditions: divided cell, 15 mL MeOH, 0.1 M TBAPF<sub>6</sub>, constant current at 10 mA, 2 cm<sup>2</sup> carbon paper electrode, 12 hours; three replicates of the measurements were produced, and the reported value is the average within = 5% of error

### Supplementary Table S3

Product yields and calculated Faraday efficiency for reactions with a constant ratio of  $\text{NiCl}_2 \cdot 6\text{H}_2\text{O}$ /BPE and varying absolute concentrations at 12 hours

| Entry | BPE (mM) | $\text{NiCl}_2 \cdot 6\text{H}_2\text{O}$ (mM) | Mole Ratio of $\text{NiCl}_2 \cdot 6\text{H}_2\text{O}$ / BPE | Conversion (%) | Product Yield (%)                                                                   |                                                                                     | Faraday Efficiency (%) |
|-------|----------|------------------------------------------------|---------------------------------------------------------------|----------------|-------------------------------------------------------------------------------------|-------------------------------------------------------------------------------------|------------------------|
|       |          |                                                |                                                               |                |  |  |                        |
| 1     | 10       | 40                                             | 4                                                             | 98             | 88                                                                                  | 80                                                                                  | 5.9                    |
| 2     | 20       | 80                                             | 4                                                             | 91             | 68                                                                                  | 73                                                                                  | 9.0                    |
| 3     | 30       | 120                                            | 4                                                             | 70             | 51                                                                                  | 55                                                                                  | 10.1                   |
| 4     | 5        | 40                                             | 8                                                             | 99             | 85                                                                                  | 80                                                                                  | 2.8                    |
| 5     | 10       | 80                                             | 8                                                             | 89             | 70                                                                                  | 69                                                                                  | 4.7                    |

Reaction conditions: divided cell, 15 mL MeOH, 0.1 M  $\text{TBAPF}_6$ , constant current at 10 mA, 2 cm<sup>2</sup> carbon paper electrode, 12 hours; three replicates of the measurements were produced, and the reported value is the average within = 5% of error

### Supplementary Figure S1

Kinetic plot of electrochemical reductive cleavage of 0.2 mmol BPE in 10 mL methanol, 0.1 M TBAPF<sub>6</sub>, 20 mA constant current, Ni foam<sub>anode</sub> and Ni foam<sub>cathode</sub> in the undivided cell

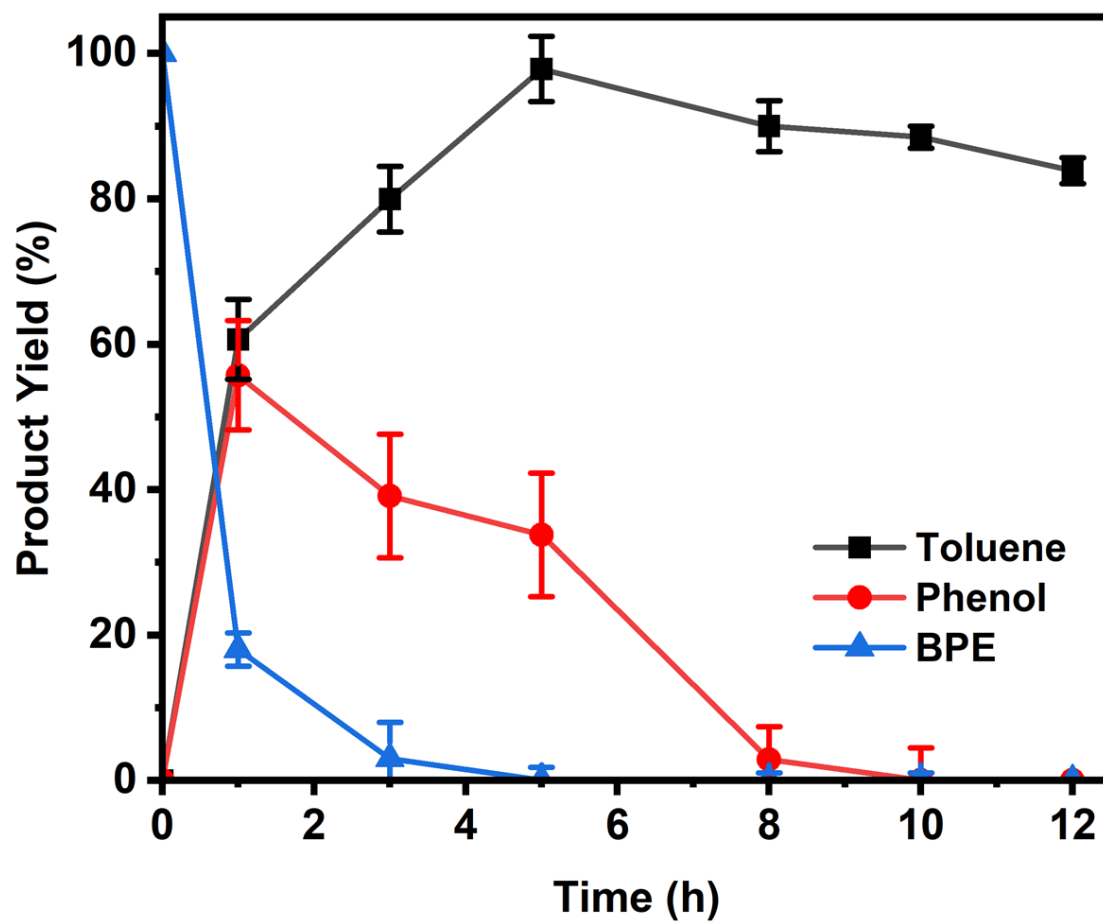

### Supplementary Figure S2

CV curves of different Ni salts (40 mM) in 15 mL 0.10 M TBAPF<sub>6</sub>-MeOH, scan rate: 50 mV/s.

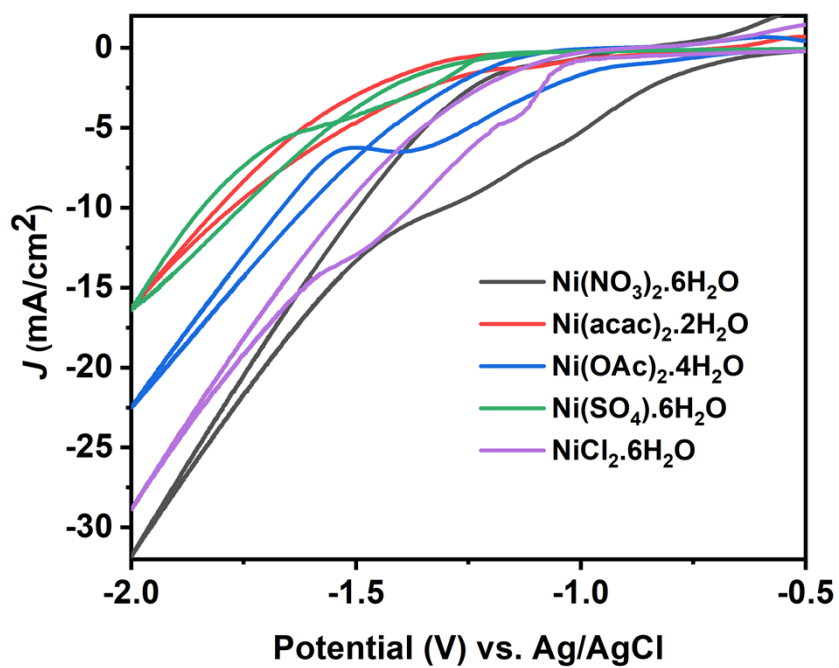



### Supplementary Figure S3

CV curves of  $\text{CuCl}_2$ ,  $\text{CoCl}_2 \cdot 6\text{H}_2\text{O}$ , and  $\text{FeCl}_2 \cdot 4\text{H}_2\text{O}$  in 15 mL 0.10 M TBAPF<sub>6</sub>-MeOH, 40 mM of metal chloride salts, 10 mM BPE, scan rate: 50 mV/s.

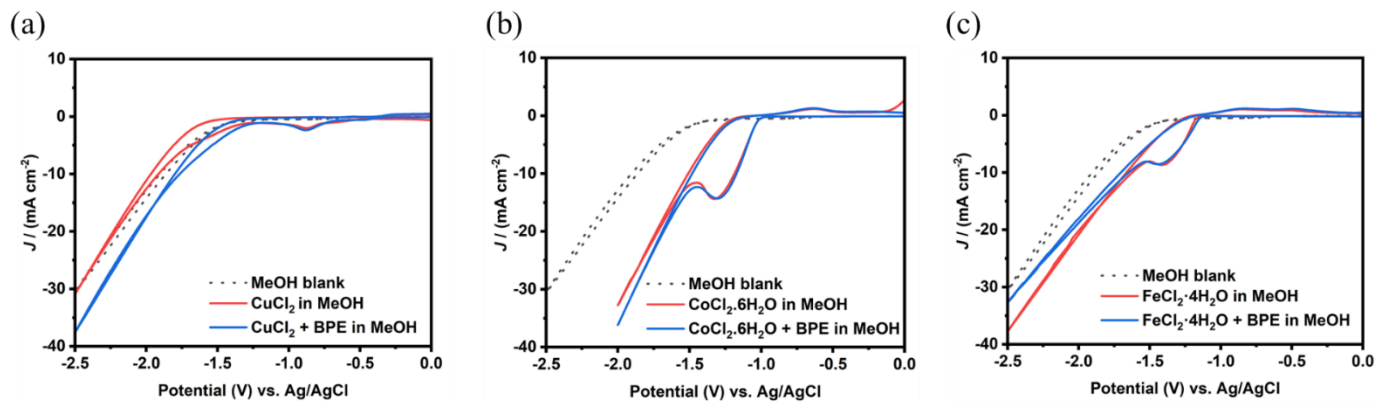

### Supplementary Figure S4

Reusability experiments of carbon paper cathode

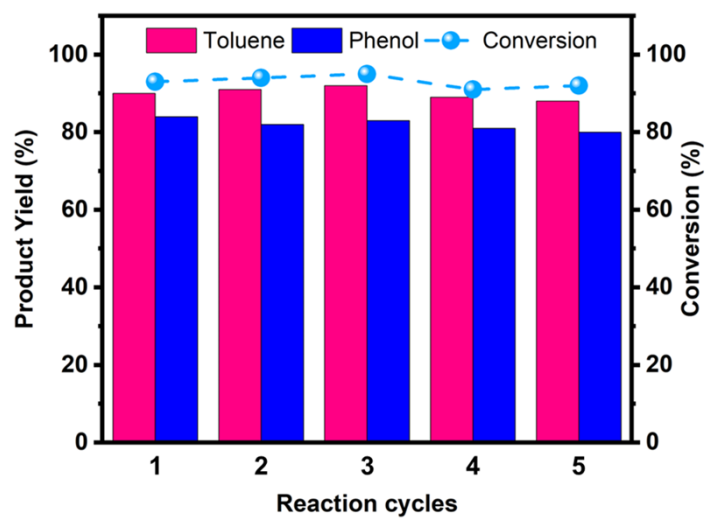

### Supplementary Figure S5

1-(benzyloxy)-4-(tert-butyl)benzene (**d**)  $^1\text{H}$  NMR (400 MHz,  $\text{CDCl}_3$ )

$^1\text{H}$  NMR (400 MHz,  $\text{cdcl}_3$ )  $\delta$  7.43 (d,  $J = 6.9$  Hz, 2H), 7.40 – 7.34 (m, 2H), 7.31 (ddt,  $J = 8.0, 6.7, 1.4$  Hz, 3H), 6.95 – 6.87 (m, 2H), 5.04 (s, 2H), 1.29 (d,  $J = 1.4$  Hz, 9H).

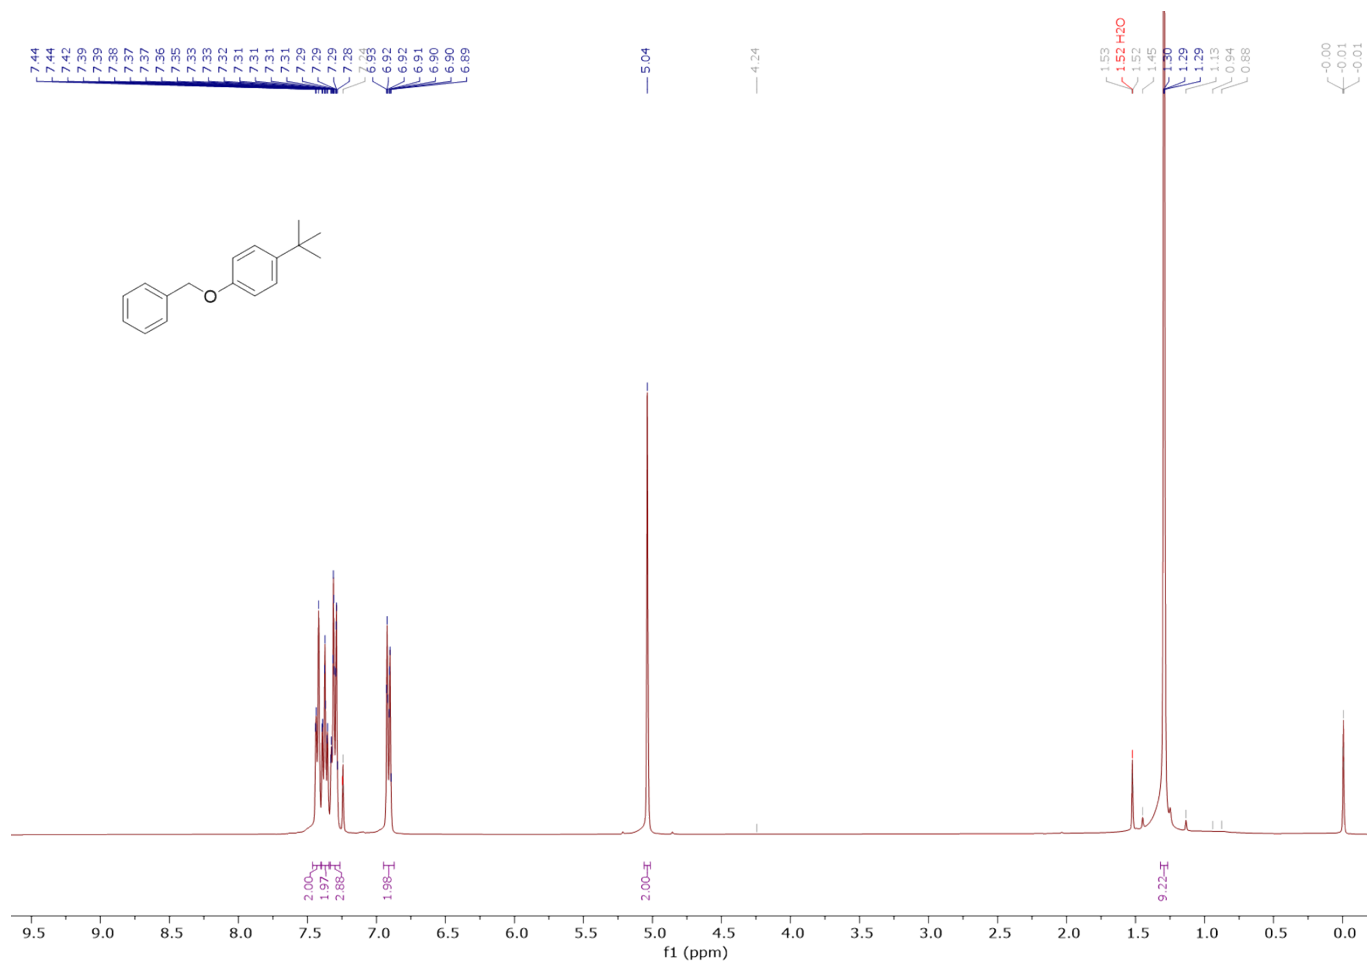

### Supplementary Figure S6

1-(benzyloxy)-4-(tert-butyl)benzene (**d**)  $^{13}\text{C}$  NMR (101 MHz,  $\text{CDCl}_3$ )

$^{13}\text{C}$  NMR (101 MHz,  $\text{cdcl}_3$ )  $\delta$  156.57, 143.58, 137.28, 128.54, 127.86, 127.47, 126.23, 114.23, 70.00, 34.06, 31.50.

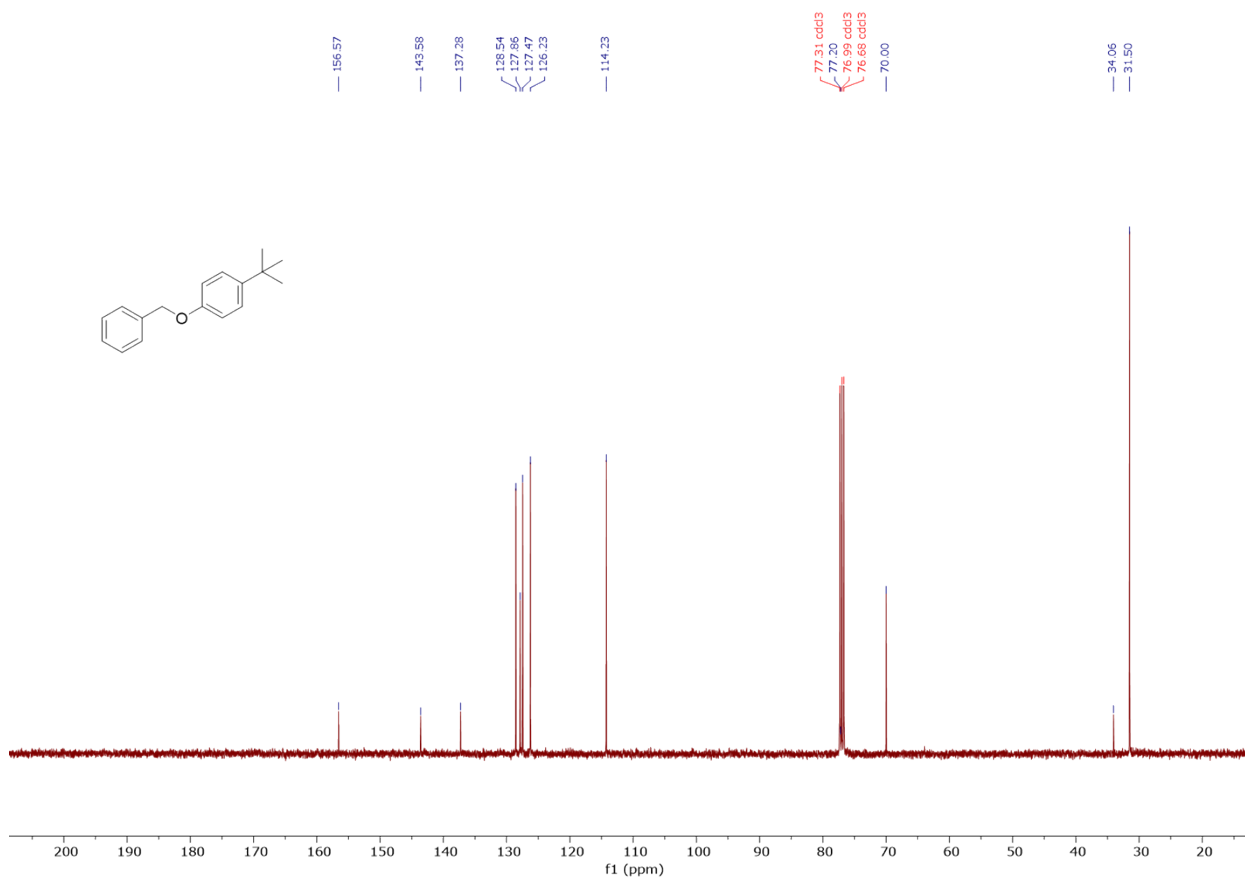

### Supplementary Figure S7

1-(benzyloxy)-4-methylbenzene (e)  $^1\text{H}$  NMR (400 MHz,  $\text{CDCl}_3$ )

$^1\text{H}$  NMR (400 MHz,  $\text{CDCl}_3$ )  $\delta$  7.46 – 7.40 (m, 2H), 7.40 – 7.34 (m, 2H), 7.34 – 7.28 (m, 1H), 7.12 – 7.04 (m, 2H), 6.91 – 6.84 (m, 2H), 5.03 (s, 2H), 2.28 (s, 3H).

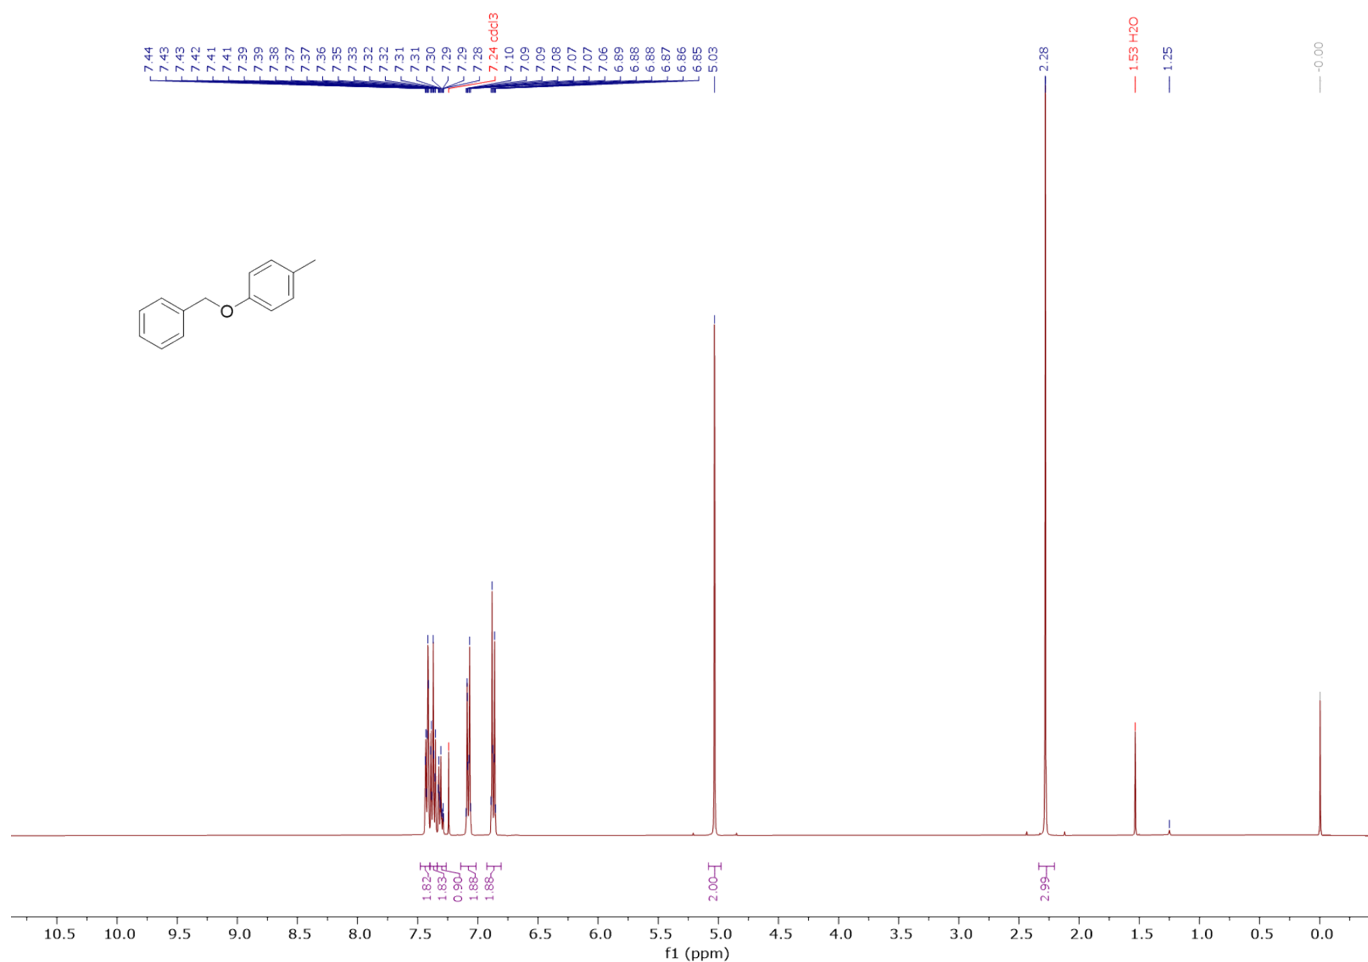



### Supplementary Figure S8

1-(benzyloxy)-4-methylbenzene (e)  $^{13}\text{C}$  NMR (101 MHz,  $\text{CDCl}_3$ )

$^{13}\text{C}$  NMR (101 MHz,  $\text{CDCl}_3$ )  $\delta$  156.65, 137.24, 130.14, 129.90, 128.54, 127.86, 127.44, 114.67, 70.04, 20.48.

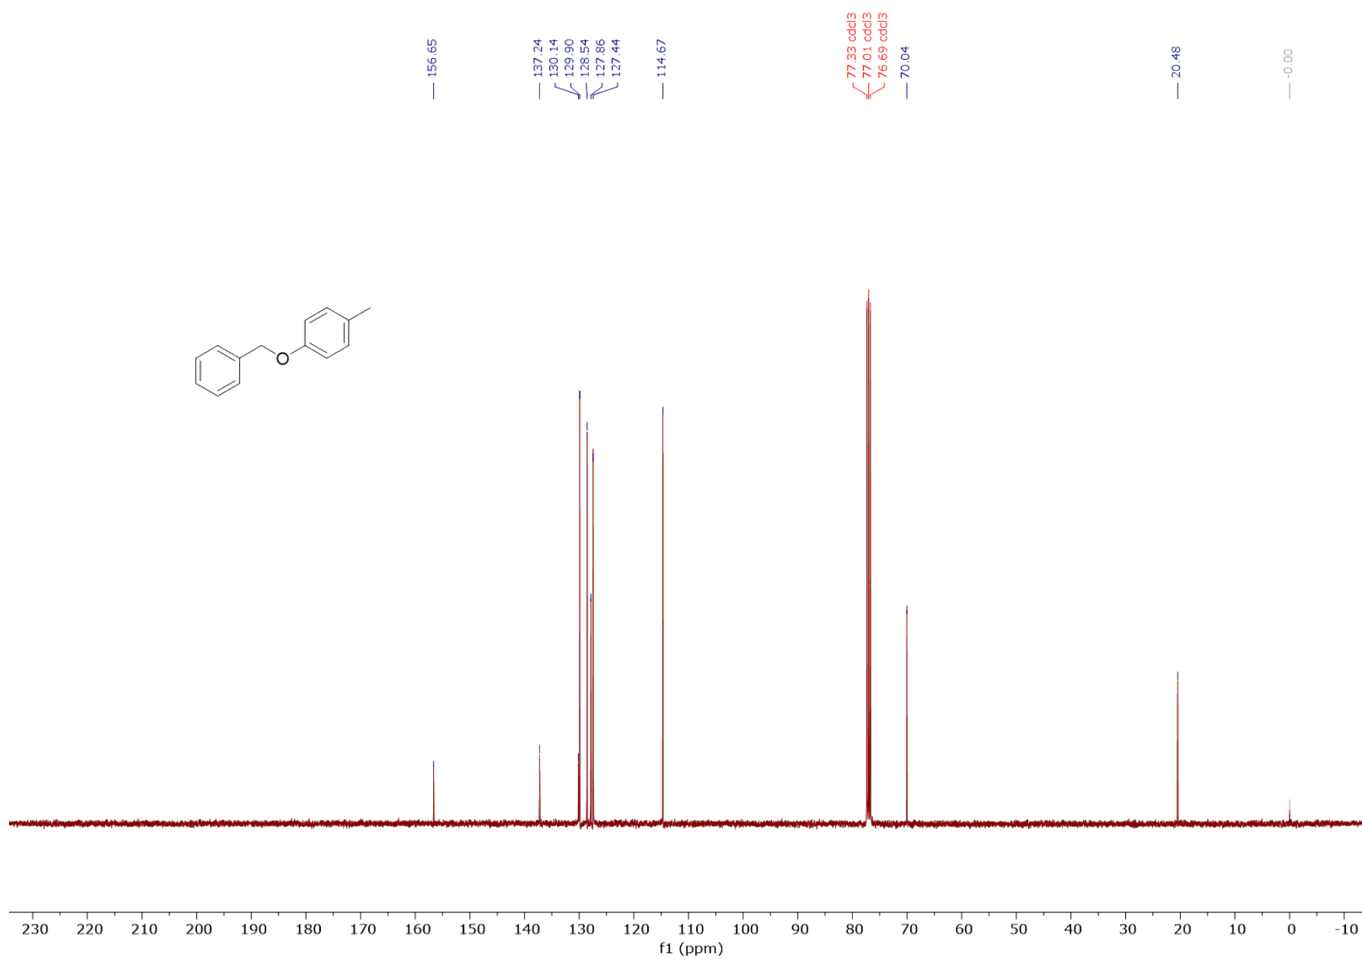

### Supplementary Figure S9

1-(Benzyloxy)-4-methoxybenzene (f)  $^1\text{H}$  NMR (400 MHz,  $\text{CDCl}_3$ )

$^1\text{H}$  NMR (400 MHz, acetone)  $\delta$  7.46 (ddt,  $J = 0.7, 1.5, 7.5$  Hz, 2H), 7.41 – 7.34 (m, 2H), 7.34 – 7.27 (m, 1H), 6.98 – 6.90 (m, 2H), 6.89 – 6.81 (m, 2H), 5.05 (s, 2H).

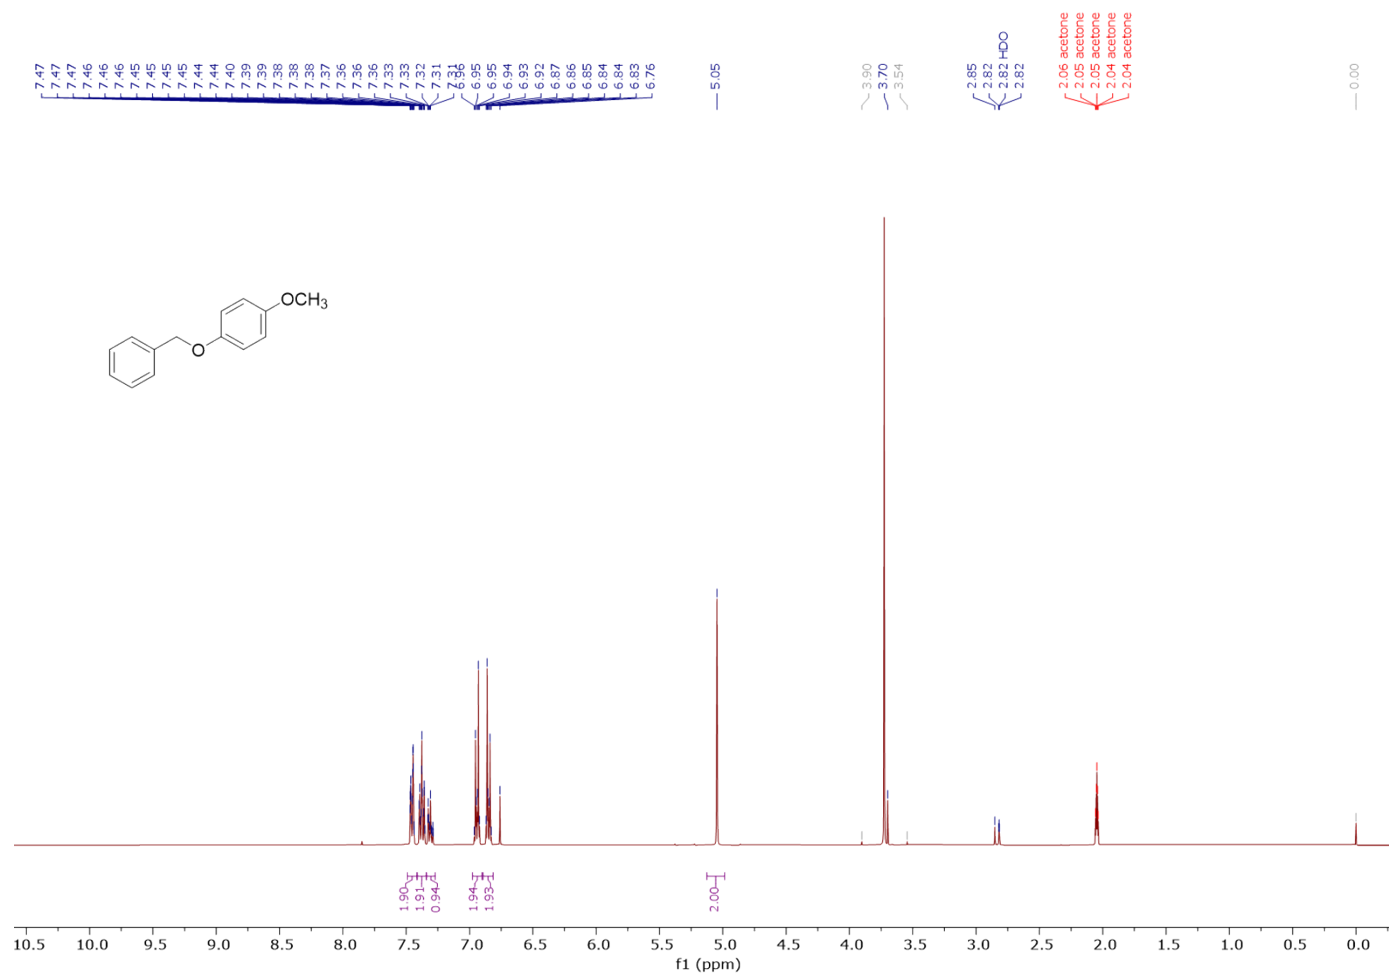





### Supplementary Figure S10

1-(Benzyloxy)-4-methoxybenzene (**f**)  $^{13}\text{C}$  NMR (101 MHz,  $\text{CDCl}_3$ )

$^{13}\text{C}$  NMR (101 MHz, acetone)  $\delta$  154.08, 152.93, 137.82, 128.32, 127.60, 127.44, 115.67, 114.46, 70.07, 70.04, 70.01, 54.91, 54.89, 29.52, 29.33, 29.14, 28.95, 28.75, 28.56, 28.37

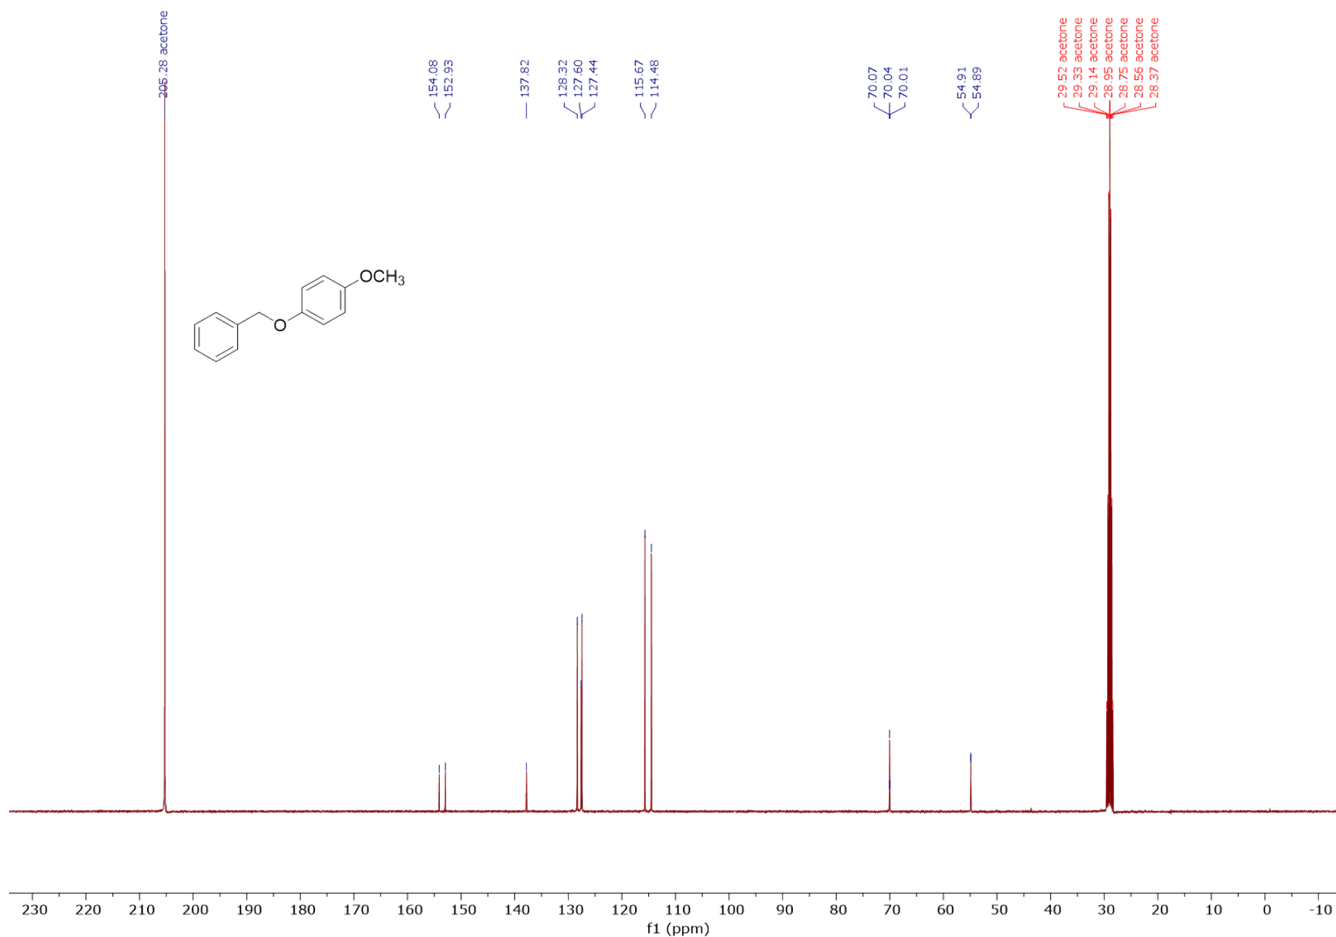

### Supplementary Figure S11

1-(phenoxyethyl)-4-(trifluoromethyl) benzene (**g**)  $^1\text{H}$  NMR (400 MHz, acetone- $d_6$ )  
 $^1\text{H}$  NMR (400 MHz, acetone)  $\delta$  7.84 – 7.60 (m, 4H), 7.37 – 7.21 (m, 2H), 7.06 – 6.99 (m, 2H), 6.95 (tt,  $J = 7.3, 1.1$  Hz, 1H), 5.23 (d,  $J = 1.0$  Hz, 2H).

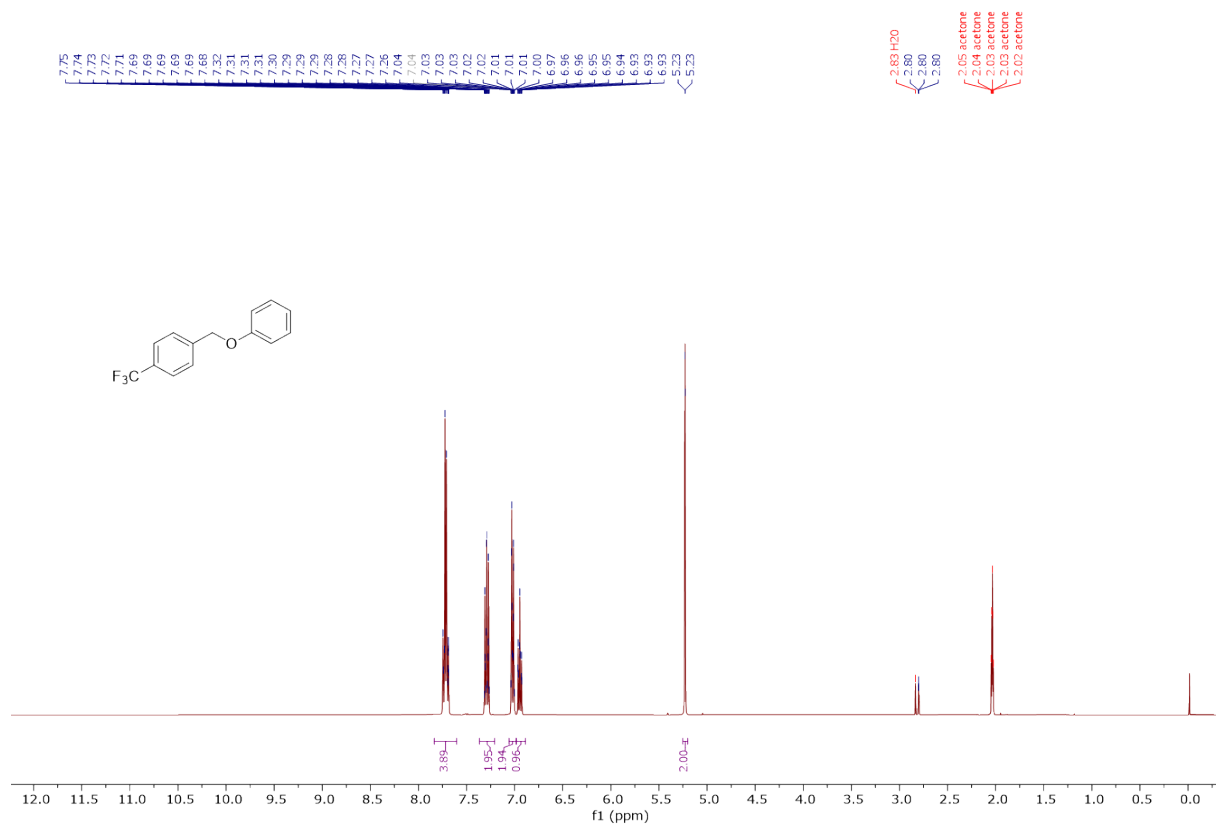

## Supplementary Figure S12

1-(phenoxyethyl)-4-(trifluoromethyl) benzene (**g**)  $^{13}\text{C}$  NMR (101 MHz, acetone- $d_6$ )

$^{13}\text{C}$  NMR (101 MHz, acetone)  $\delta$  158.57, 142.30, 129.47, 127.76, 125.29, 125.25, 123.09

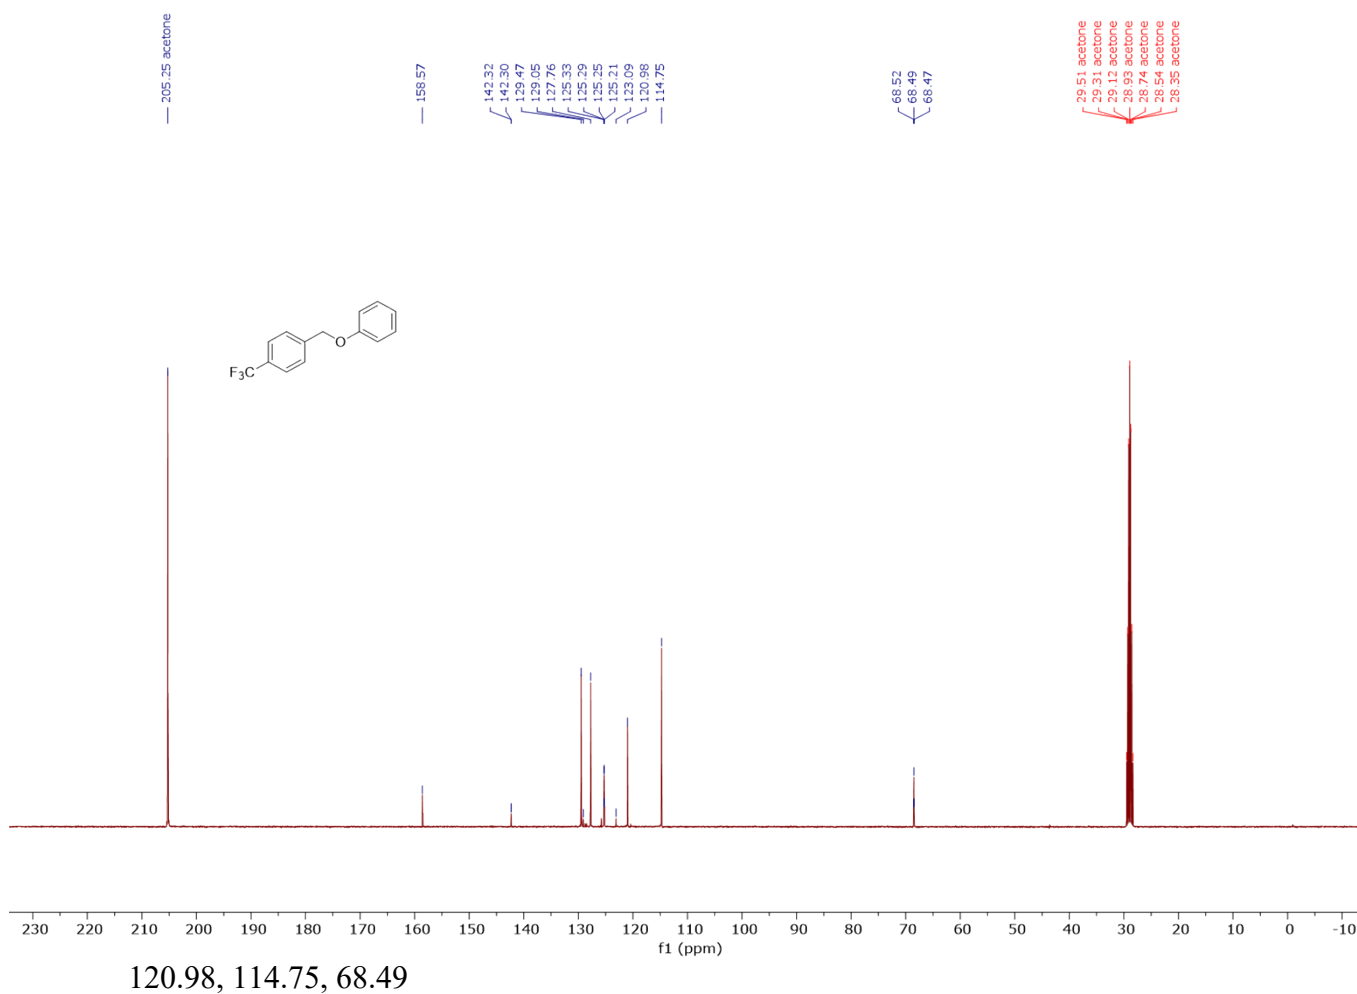

### Supplementary Figure S13

1-(tert-butyl)-4-(phenoxy)methylbenzene (**h**)  $^1\text{H}$  NMR (101 MHz,  $\text{CDCl}_3$ )

$^1\text{H}$  NMR (400 MHz,  $\text{cdCl}_3$ )  $\delta$  7.48 – 7.34 (m, 4H), 7.33 – 7.25 (m, 2H), 7.04 – 6.86 (m, 3H), 5.02 (s, 2H), 1.32 (s, 9H).

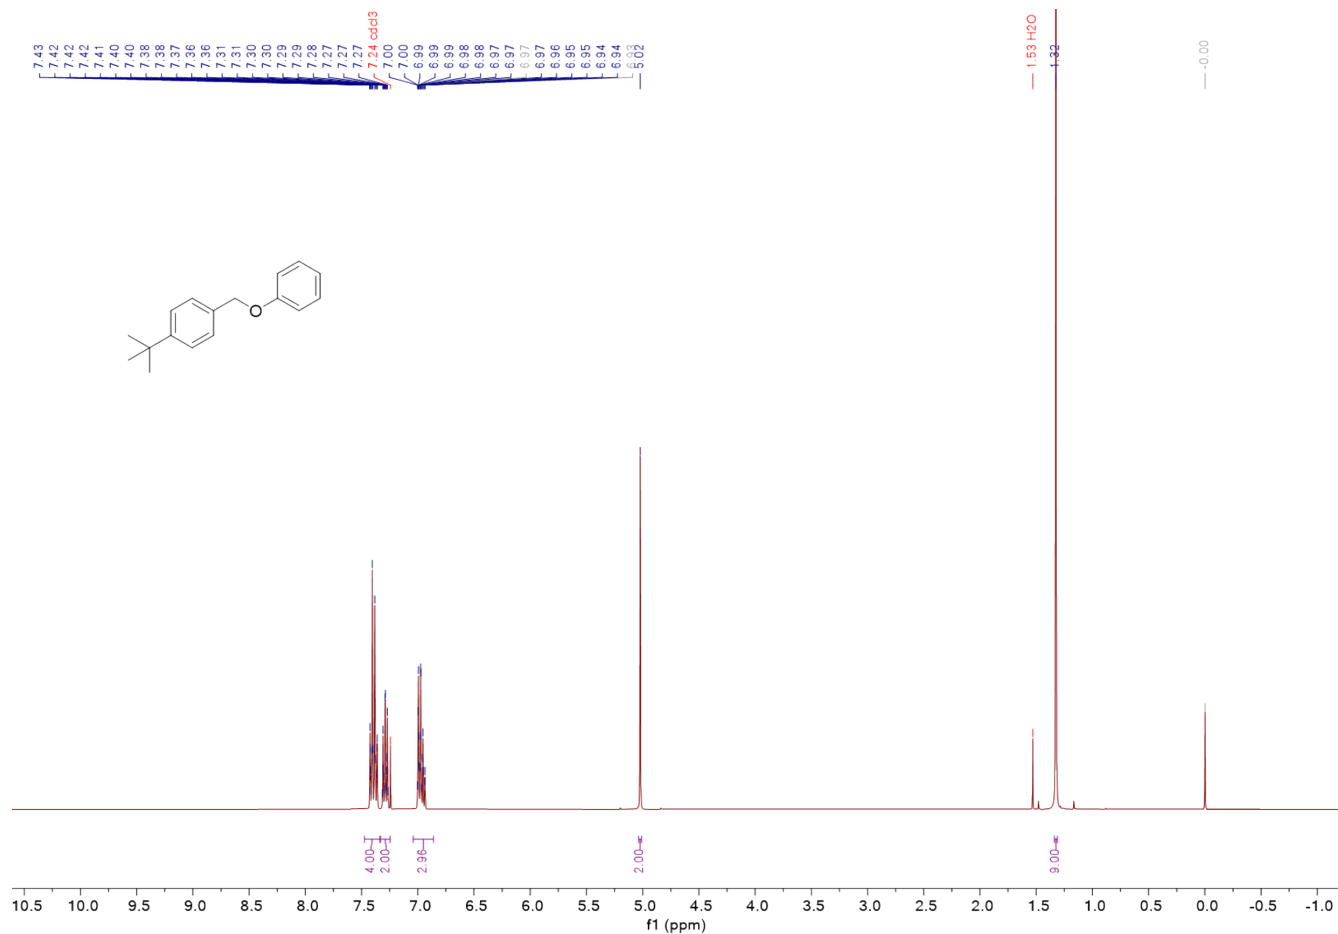

### Supplementary Figure S14

1-(tert-butyl)-4-(phenoxy)methylbenzene (**h**)  $^{13}\text{C}$  NMR (101 MHz,  $\text{CDCl}_3$ )

$^{13}\text{C}$  NMR (101 MHz,  $\text{cdcl}_3$ )  $\delta$  158.88, 151.00, 133.95, 129.46, 127.48, 125.54, 120.82, 114.76, 69.74, 34.58, 31.34.

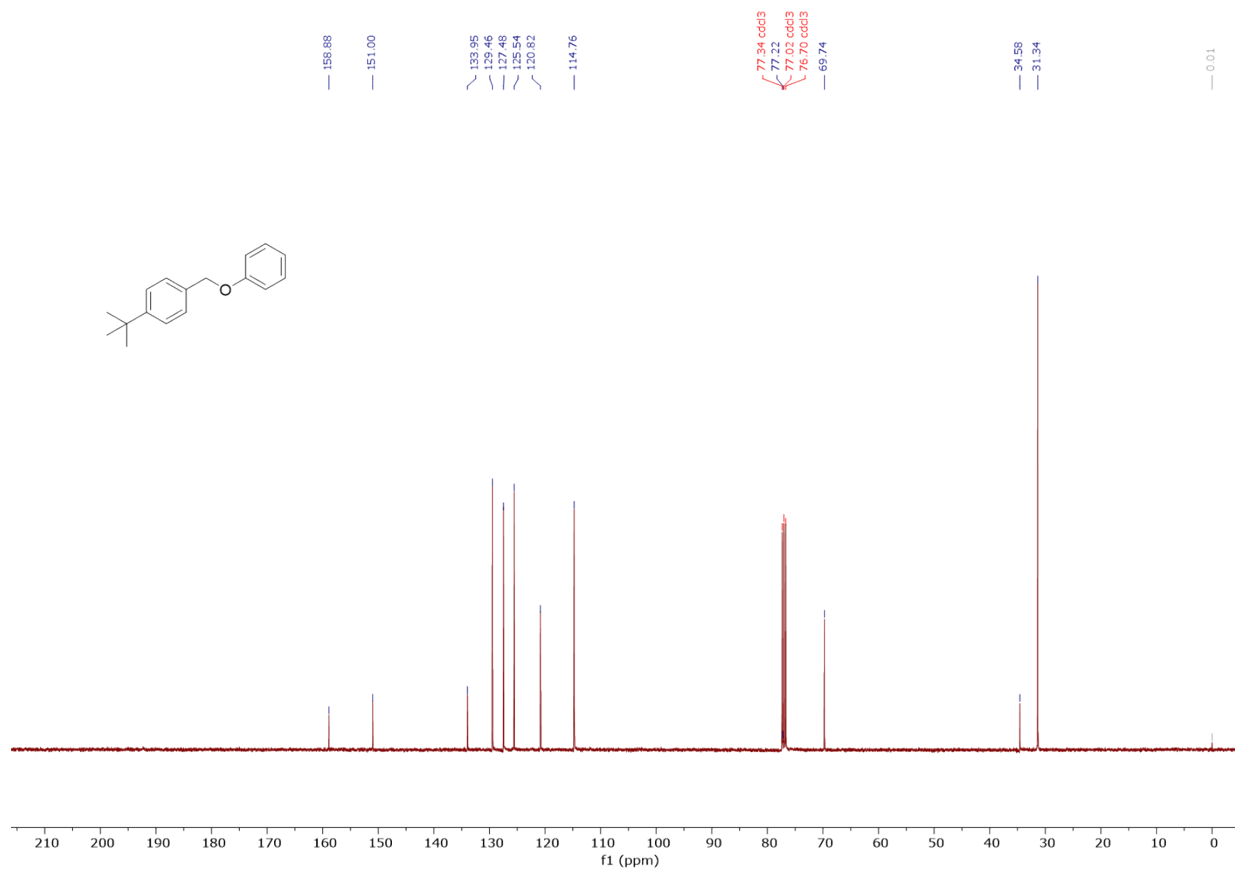

### Supplementary Figure S15

4-Methylbenzylphenyl ether (i)  $^1\text{H}$  NMR (400 MHz,  $\text{CDCl}_3$ )

$^1\text{H}$  NMR (400 MHz,  $\text{cdcl}_3$ )  $\delta$  7.41 – 7.26 (m, 4H), 7.22 (d,  $J = 14.6$  Hz, 2H), 7.04 – 6.93 (m, 3H), 5.04 (s, 2H), 2.38 (s, 3H).

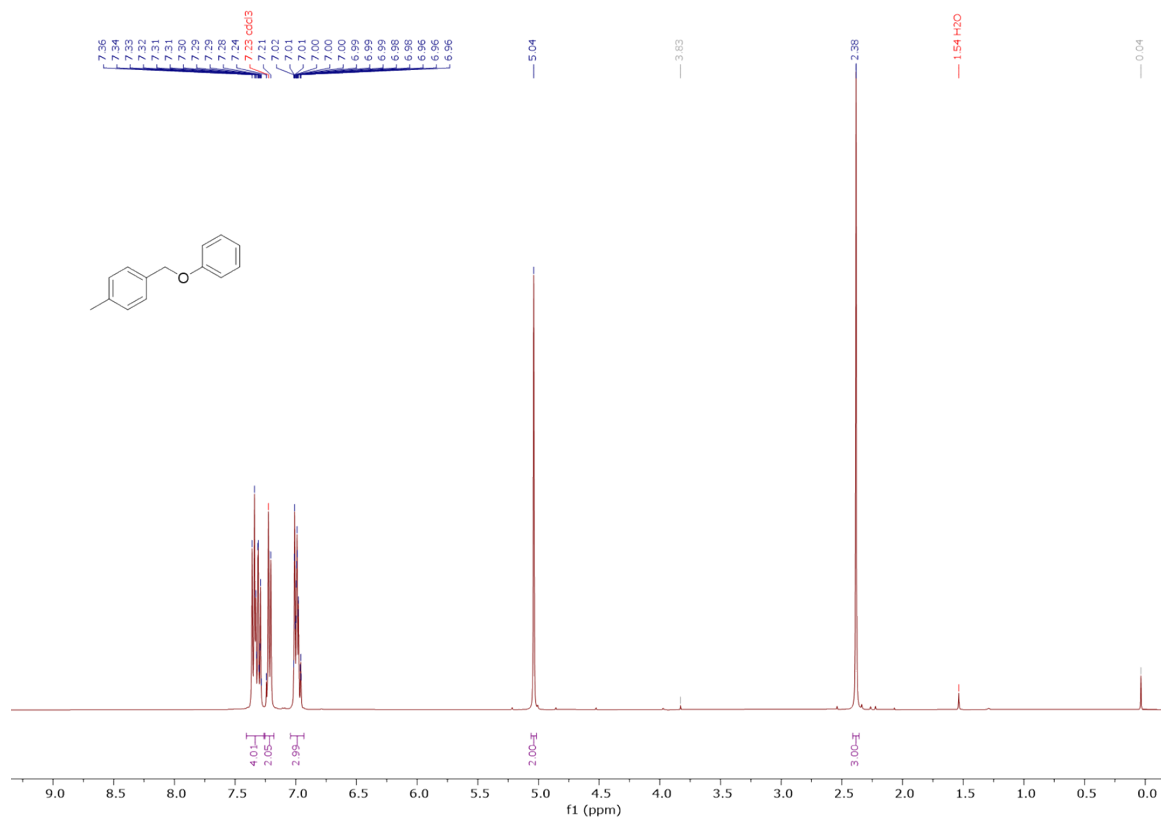

### Supplementary Figure S16

4-Methylbenzylphenyl ether (i)  $^{13}\text{C}$  NMR (101 MHz,  $\text{CDCl}_3$ )

$^{13}\text{C}$  NMR (101 MHz,  $\text{cdCl}_3$ )  $\delta$  158.86, 137.74, 134.02, 129.39 (d,  $J = 19.3$  Hz), 127.66, 120.86, 114.85, 77.28, 69.83, 21.24.

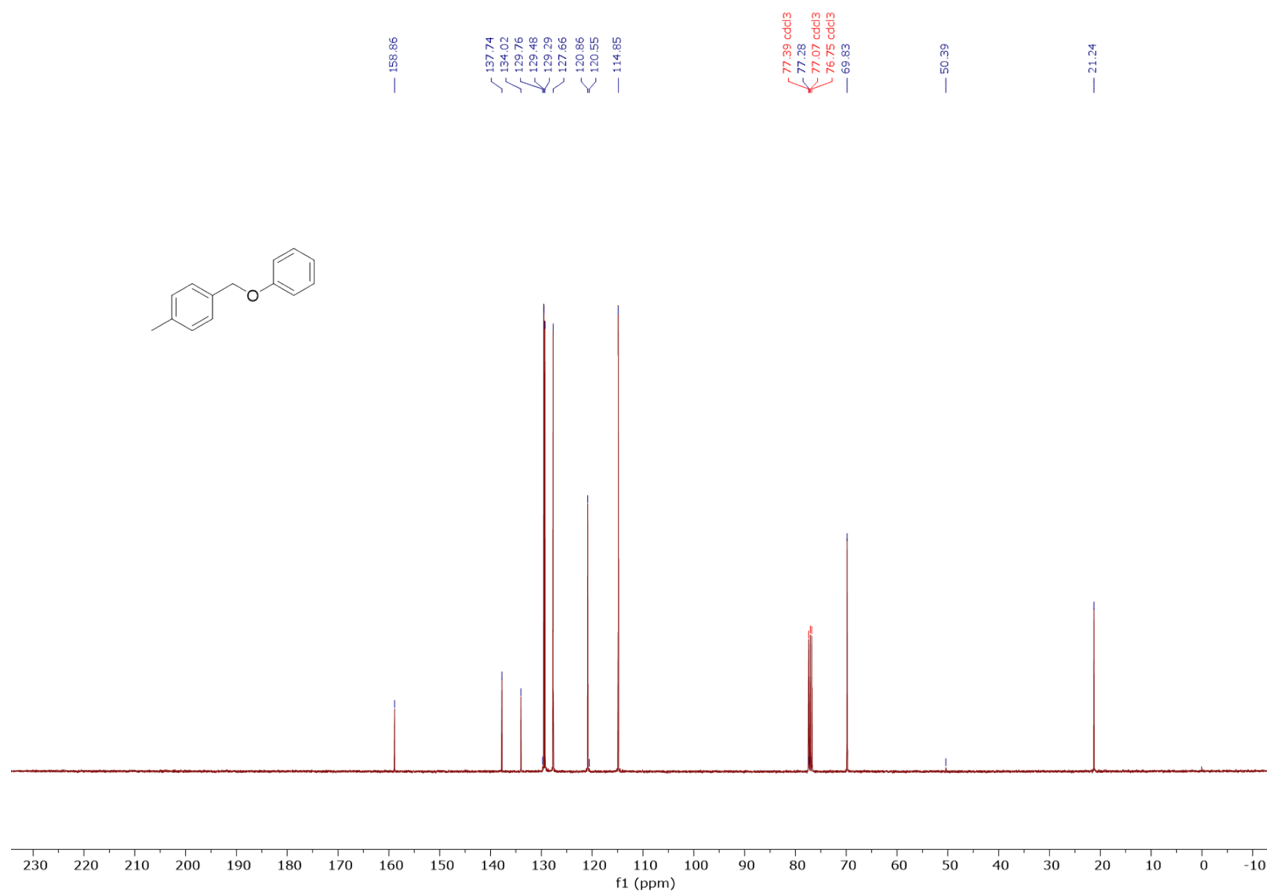



### Supplementary Figure S17

1-methoxy-4-(phenoxyethyl) benzene (**j**)  $^1\text{H}$  NMR (101 MHz,  $\text{CDCl}_3$ )

$^1\text{H}$  NMR (400 MHz,  $\text{cdCl}_3$ )  $\delta$  7.40 – 7.33 (m, 2H), 7.33 – 7.26 (m, 2H), 7.02 – 6.87 (m, 5H), 4.99 (s, 2H), 3.82 (s, 3H).

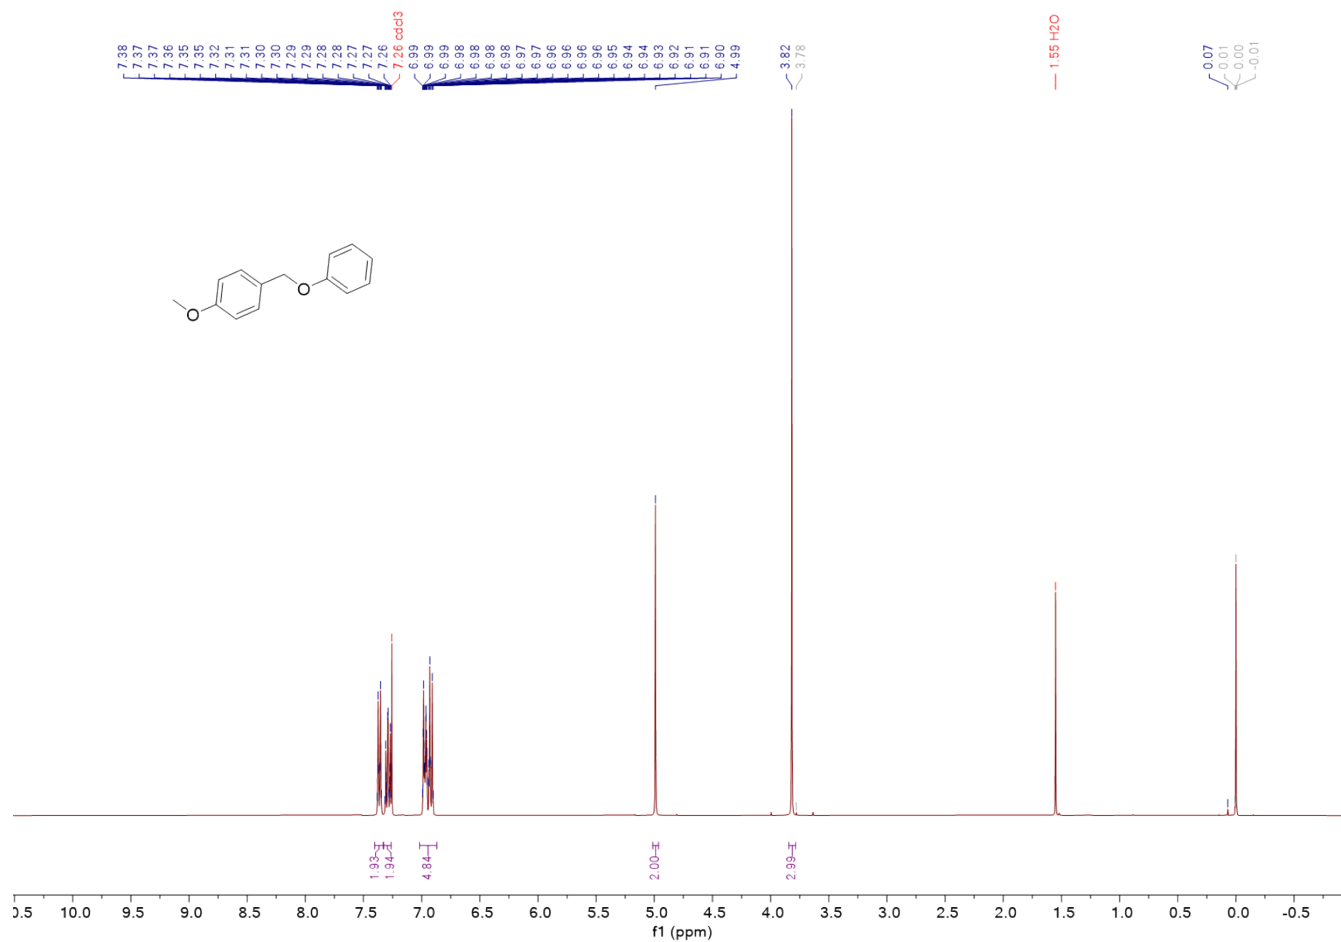



### Supplementary Figure S18

1-methoxy-4-(phenoxymethyl) benzene (**j**)  $^{13}\text{C}$  NMR (101 MHz, acetone)  $\delta$  159.53, 158.99, 129.38, 129.33, 129.24, 120.52, 114.73, 113.71, 69.16, 54.62

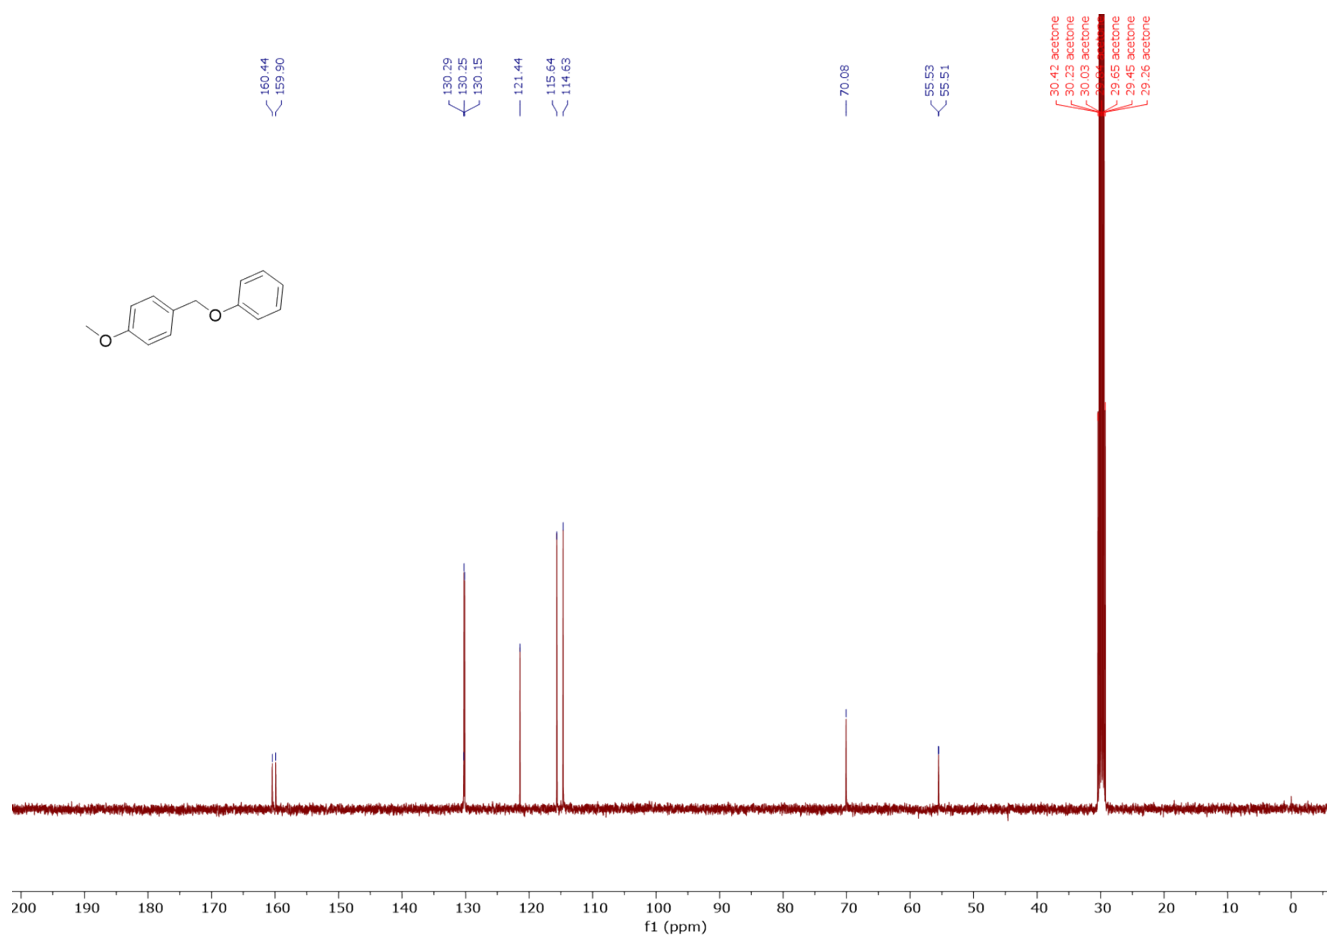

### Supplementary Figure S19

4-(phenoxyethyl) phenol (**k**)  $^1\text{H}$  NMR (400 MHz,  $\text{CDCl}_3$ )  $\delta$  7.35 – 7.26 (m, 4H), 7.02 – 6.91 (m, 3H), 6.88 – 6.79 (m, 2H), 4.98 (s, 2H), 4.85 (s, 1H).

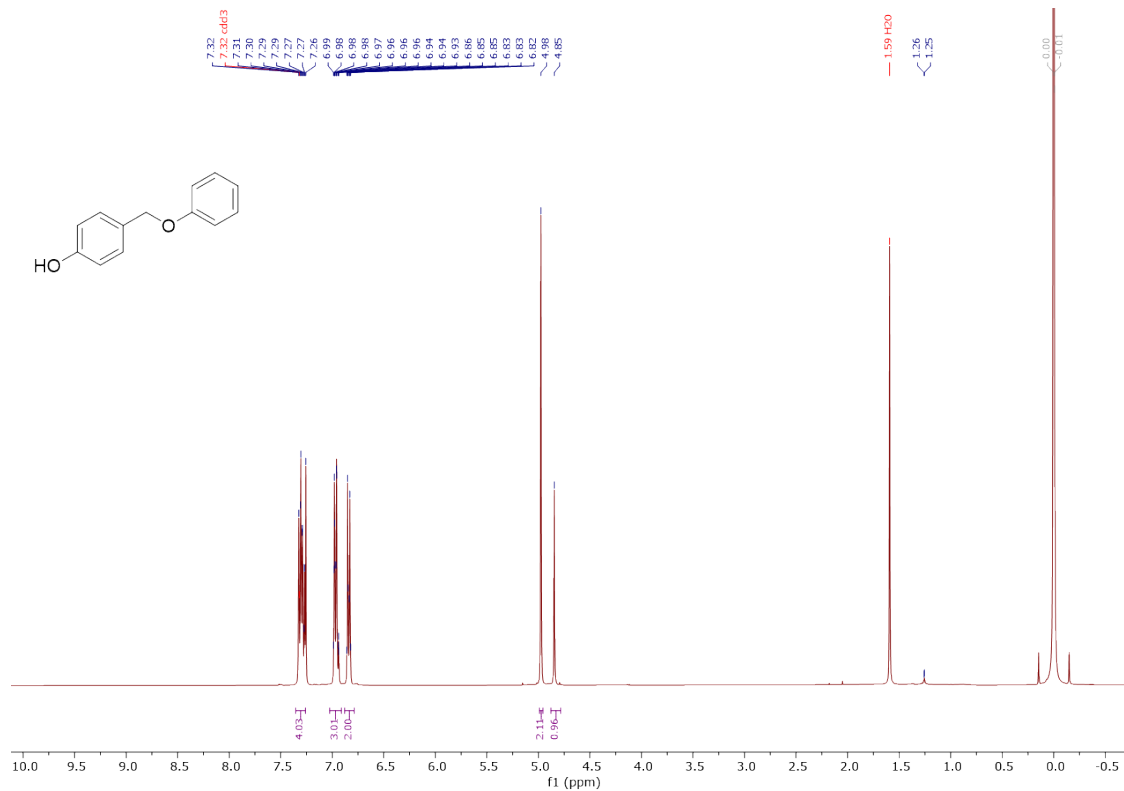

## Supplementary Figure S20

4-(phenoxy)methyl phenol (**k**)  $^{13}\text{C}$  NMR (101 MHz,  $\text{cdCl}_3$ )  $\delta$  158.77, 155.35, 129.43, 129.27, 120.87, 115.40, 114.83, 69.63.

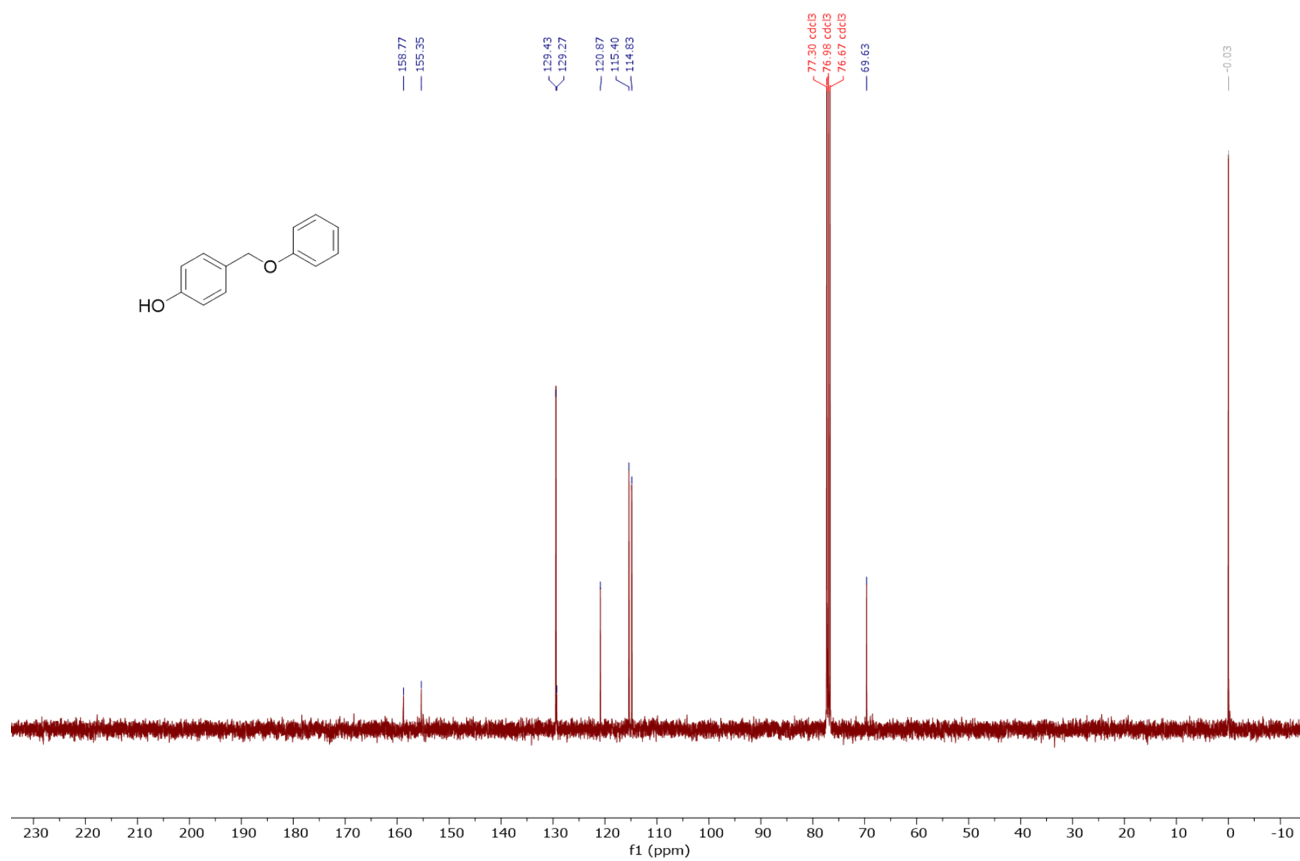

Supplement: d2gc01510b1.pdf [file d2gc01510b1.pdf]
